# Supplementary material for: Effects of prenatal photobiomodulation treatment on neonatal hypoxic ischemia in rat offspring
Source: PubMed Central journal article supplement (PMC7738878; doi:10.7150/thno.49672), 2021-01-01
Supplement: thnov11p1269s1.pdf [file thnov11p1269s1.pdf]

## Supplementary Material

### Supplementary Figures and Figure Legends

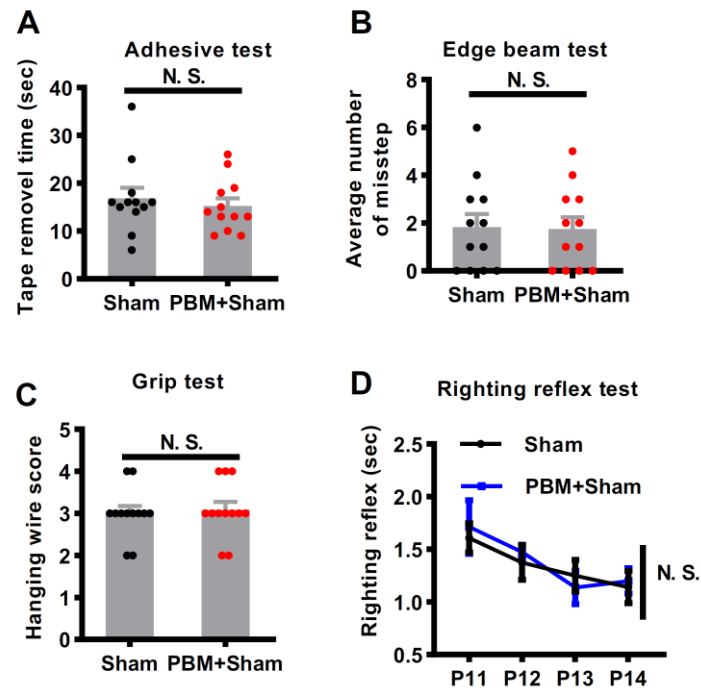

### Supplemental Figure S1. Prenatal PBM did not affect motor function in normal

**rats.** Results for the (A) adhesive test, (B) edge beam test, (C) grip test, and (D)

righting reflex test were not significantly different between sham groups with/without

PBM (Sham and PBM+Sham groups). All data are presented as mean ± SEM (n = 12).

“N.S.” indicates no significant difference ( $P > 0.05$ ).

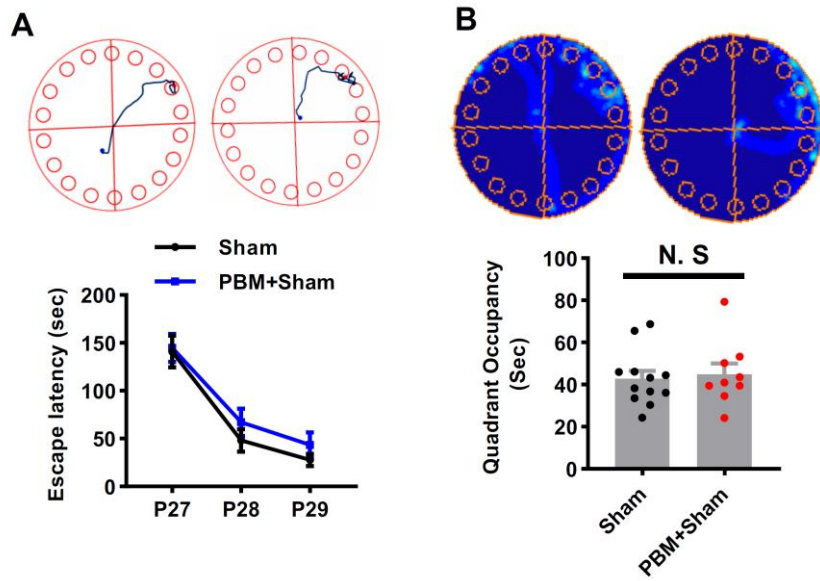

**Supplemental Figure S2. Prenatal PBM did not affect learning and memory in normal rats.** (A) Results for escape latency and (B) quadrant occupancy were not significantly different between sham groups with/without PBM treatment (Sham and PBM+Sham groups). All data are presented as mean  $\pm$  SEM (n = 9-12). “N.S.” indicates not significant ( $P > 0.05$ ).

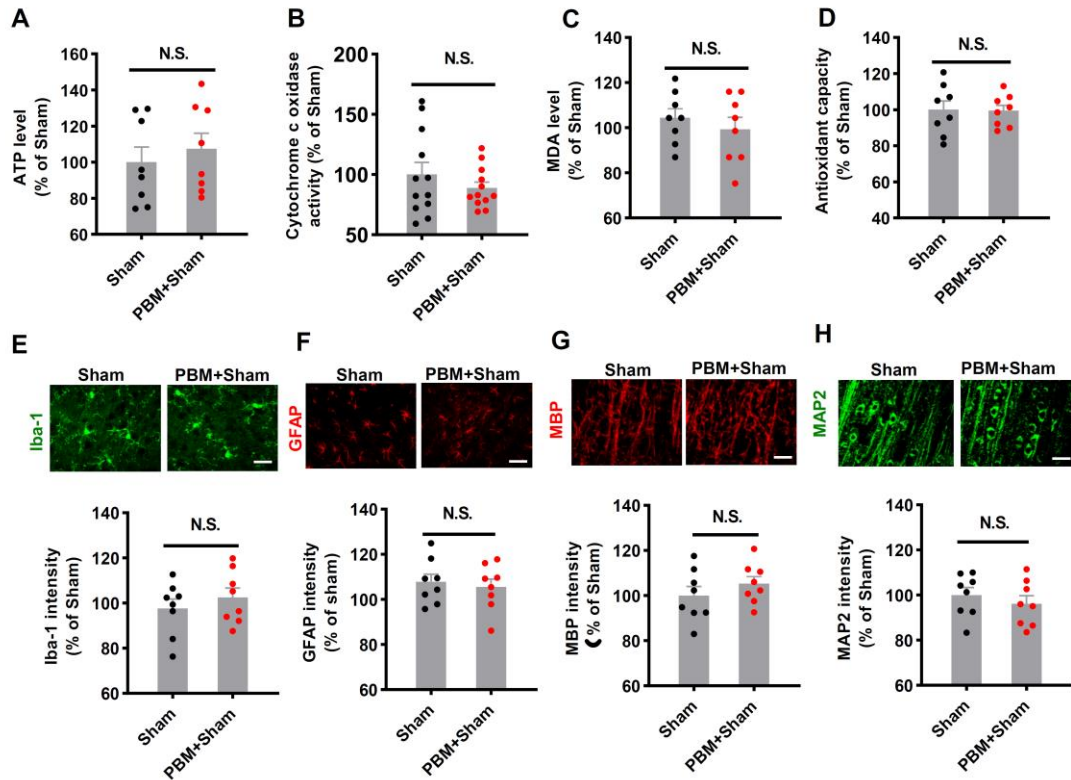

**Supplemental Figure S3. No differences were found in molecular level between Sham and PBM+Sham group.** Results for the (A) ATP content, (B) CCO activity, (C) MDA level, (D) total antioxidant capacity, (E) the intensity of Iba-1, (F) GFAP, (G) MBP and (H) MAP2 were not significantly different between sham groups with/without PBM (Sham and PBM+Sham groups). Scale bar = 20  $\mu$ m. All data are presented as mean  $\pm$  SEM (n = 8). "N.S." indicates no significant difference ( $P > 0.05$ ).

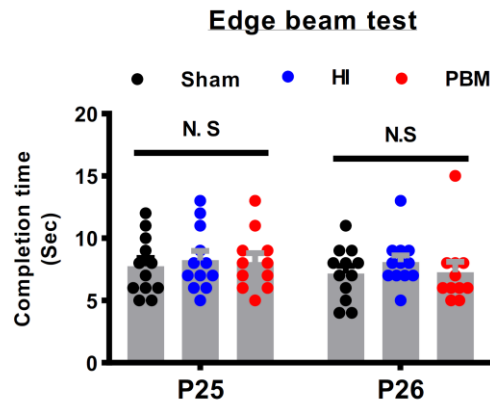

**Supplemental Figure S4. HI insult and prenatal PBM do not affect velocity.** The edge beam test indicated no significant difference in escape velocity between the three groups. All data are presented as mean  $\pm$  SEM ( $n = 12$ ). “N.S.” indicates not significant ( $P > 0.05$ ).

**Table S1**

**Device information**

|                                  |                                                       |
|----------------------------------|-------------------------------------------------------|
| Manufacturer                     | Changchun new industries Optoelectronics Tech, CP., L |
| Model identifier                 | MDL-III-808-500 mW                                    |
| Number of emitters               | 1                                                     |
| Wavelength                       | 808 ± 3.0                                             |
| Spatial distribution of emitters | Round LED spotlight                                   |
| Emitter type                     | Diode IR laser                                        |
| Beam delivery system             | Fiberoptic                                            |

**Supplemental Table S1.** Device information for the Diode IR Laser System used for prenatal PBM treatment.
